# Supplementary material for: Genotype and diet shape resistance and tolerance across distinct phases of bacterial infection
Source: PubMed Central journal article supplement (PMC3997931; doi:10.1186/1471-2148-14-56), 2014-03-22

High-sugar diet

Low-sugar diet

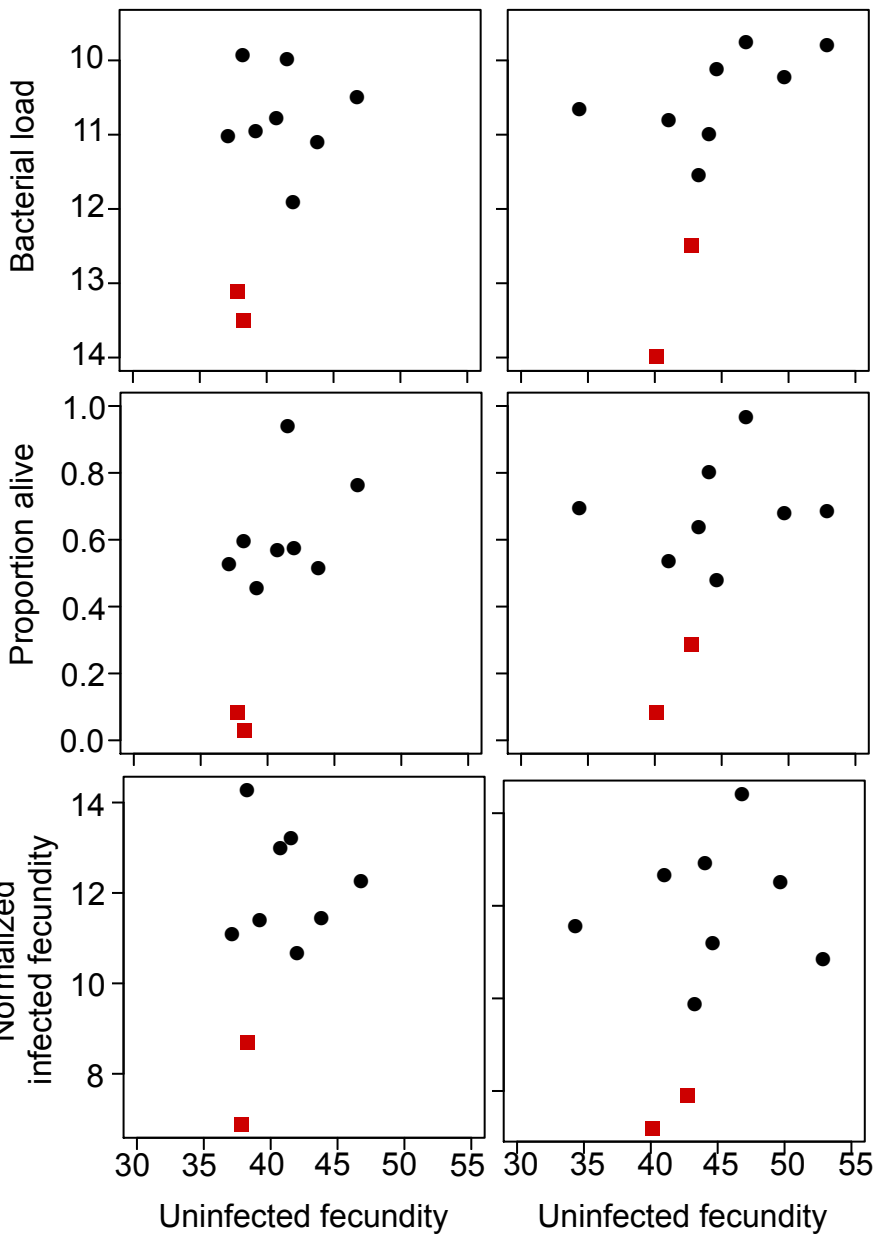

Supplement: 1471-2148-14-56-S2.pdf [file 1471-2148-14-56-S2.pdf]
